# Supplementary material for: Helical versus linear Jahn–Teller distortions in allene and spiropentadiene radical cations
Source: Royal Society of Chemistry journal article supplement (doi:10.1039/d2cp03544h), 2022-01-01
Supplement: d2cp03544h1.pdf [file d2cp03544h1.pdf]

# Electronic Supplementary Information for: Helical versus linear helical Jahn-Teller distortions in allene and spiropentadiene radical cations

Marc H. Garner, Ruben Laplaza, and Clemence Corminboeuf\*

*Laboratory for Computational Molecular Design, Institute of Chemical Sciences and  
Engineering, Ecole Polytechnique federale de Lausanne (EPFL), 1015 Lausanne,  
Switzerland.*

E-mail: [clemence.corminboeuf@epfl.ch](mailto:clemence.corminboeuf@epfl.ch)

# Normal Modes of Stationary Points

In the introduction of the manuscript we discuss the  $D_2$  and  $C_{2v}$  stationary points of the allene and spiropentadiene radical cations. In Table S1 and S2 we list the first 5 normal modes of the frequency analysis computed with the  $\omega$ B97X-D functional and the def2-TZVP basis in Gaussian16.<sup>1-3</sup> In both systems the  $D_2$  structures are the global minima with no imaginary frequencies. In allene, the  $C_{2v}$  stationary point is a 1st order saddle point where the torsion mode is an imaginary frequency, see also the in-depth work of Schulenberg and Merkt.<sup>4,5</sup> In spiropentadiene, the  $C_{2v}$  stationary point is a 2nd order saddle point with two imaginary vibrational modes. The  $C_{2v}$  stationary point failed to optimize to fully meet the *tight* optimization criteria; the *maximum displacement* criteria only reaches 0.000184 with the *tight* threshold being 0.000060, but is within the standard threshold of 0.001800. The torsion mode is at  $-218 \text{ cm}^{-1}$ , and a bending mode around the central spiro carbon is at  $-169 \text{ cm}^{-1}$ .

**Table S1: First 5 normal modes of  $D_2$  and  $C_{2v}$  structures of allene cation.**

|       | $D_2$                | $C_{2v}$               |
|-------|----------------------|------------------------|
| $v_1$ | 323 $\text{cm}^{-1}$ | -1167 $\text{cm}^{-1}$ |
| $v_2$ | 342 $\text{cm}^{-1}$ | 327 $\text{cm}^{-1}$   |
| $v_3$ | 784 $\text{cm}^{-1}$ | 333 $\text{cm}^{-1}$   |
| $v_4$ | 805 $\text{cm}^{-1}$ | 763 $\text{cm}^{-1}$   |
| $v_5$ | 922 $\text{cm}^{-1}$ | 891 $\text{cm}^{-1}$   |

**Table S2: First 5 normal modes of  $D_2$  and  $C_{2v}$  structures of spiropentadiene cation.**

|       | $D_2$                | $C_{2v}$              |
|-------|----------------------|-----------------------|
| $v_1$ | 305 $\text{cm}^{-1}$ | -218 $\text{cm}^{-1}$ |
| $v_2$ | 360 $\text{cm}^{-1}$ | -169 $\text{cm}^{-1}$ |
| $v_3$ | 380 $\text{cm}^{-1}$ | 364 $\text{cm}^{-1}$  |
| $v_4$ | 570 $\text{cm}^{-1}$ | 381 $\text{cm}^{-1}$  |
| $v_5$ | 589 $\text{cm}^{-1}$ | 654 $\text{cm}^{-1}$  |

# CASPT2 Computations

Allene and spiropentadiene radical cations are optimized with  $D_2$  and  $C_{2v}$  symmetry constraint using CASPT2 with cc-pVDZ as implemented in OpenMolcas.<sup>6,7</sup> State-averaged CASSCF is used to optimize the wavefunctions that are used in the CASPT2 computation.

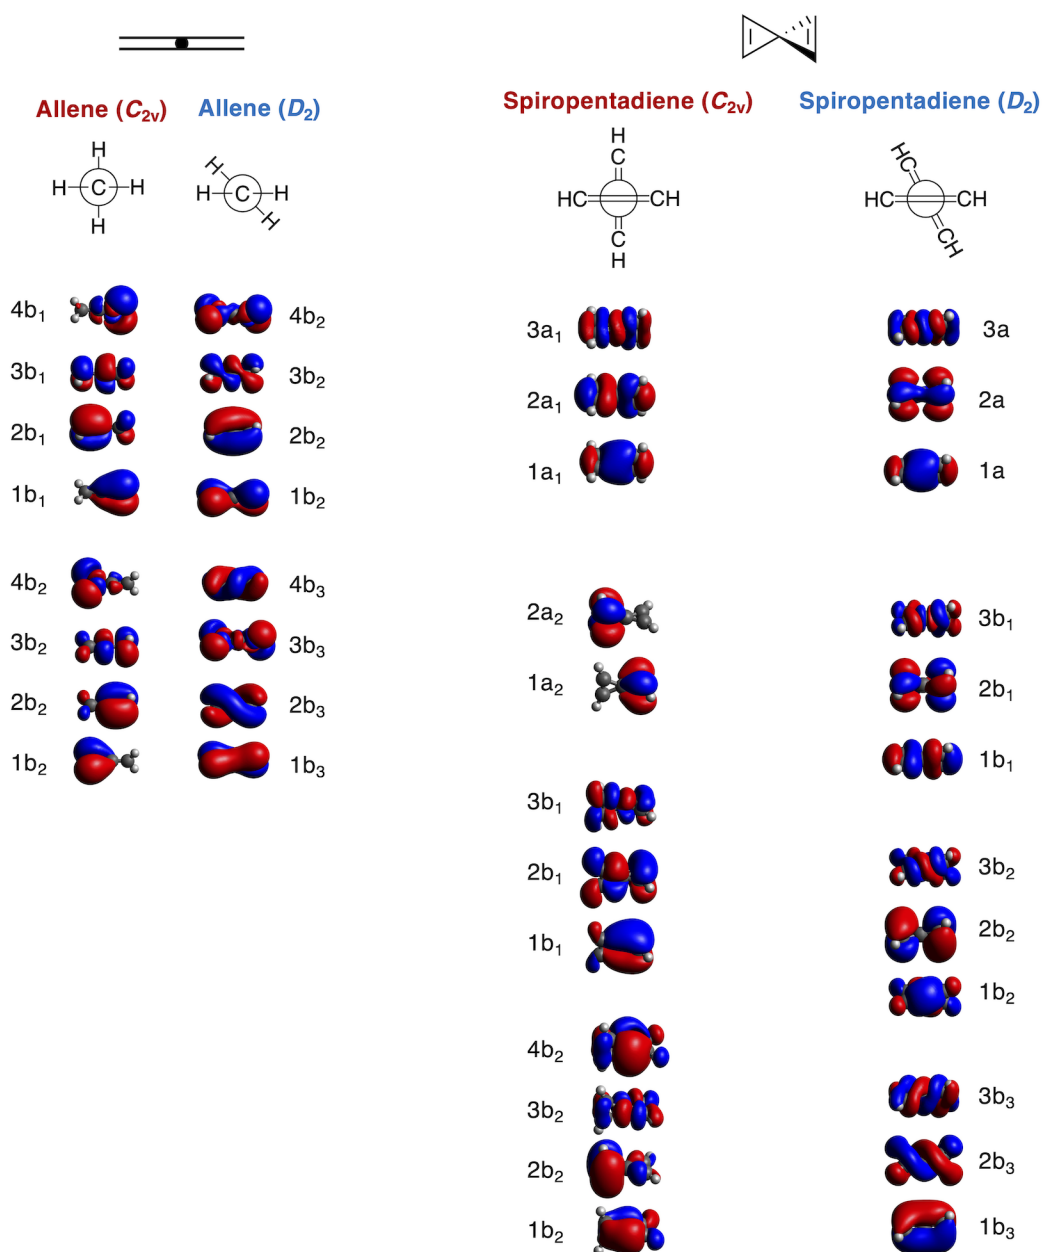

Figure S1: Active spaces (CASSCF MOs) for  $C_{2v}$  and  $D_2$  allene and spiropentadiene radical cations.

Shown in the left half of Figure S1, (7,8) active spaces were chosen for the two allene cation structures to cover their  $\pi$ -spaces, as well as the hydrogen s-orbitals that hyperconjugate into the  $\pi$ -system. The  $C_{2v}$  ground-state is 94% SCF doublet state with singly-occupied  $2b_2$ . The  $D_2$  ground-state is 94% SCF doublet state with singly-occupied  $2b_3$ .

Shown in the right half of Figure S1, (11,12) active spaces were chosen for the two spiropentadiene cation structures to cover their  $\pi$ -spaces. The active space further covers  $\sigma$ -orbitals on the spiro-carbon and double-bonds, which can mix into the  $\pi$ -system when the symmetry is reduced. The  $C_{2v}$  ground-state is 88% SCF doublet state with singly-occupied  $2b_1$ . The  $D_2$  ground-state is 88% SCF doublet state with singly-occupied  $2b_3$ .

## Tolane, Diboracumulenes and Borynes

We find few issues for the simple mnemonic which relates the number of  $\pi$  electrons to the structure of linear molecules also accounts for. A challenge arises in systems where there is no intuitive way to segment the molecule into a separate linear component. In diphenylacetylene (tolane) the torsion barrier is 0.6 kcal/mol and the energy difference between the co-planar and perpendicular conformation is thus negligible.<sup>8,9</sup> How does one segment tolane? We can put 6  $\pi$ -electrons into the linear part, leaving 5 in each phenyl ring; this correctly predicts the co-planar structure. Or we envision 6  $\pi$ -electrons localized in each phenyl ring, which leaves 4  $\pi$ -electrons in the linear segment that gives a perpendicular orientation of the rings. The co-planar arrangement turns out to be the slightly more stable one.<sup>8,9</sup>

The disputed cases of chemical bonding in diboracumulenes and borynes, which were reported by Braunschweig and co-workers, are also well-accounted for.<sup>10-13</sup> Structurally they are similar to diaminoacetylene in the sense that the number of  $\pi$ -electrons differs from the equivalent all-carbon systems due to heteroatoms.<sup>14</sup> In the electron-deficient bora-systems the heteroatoms are in the center of the linear chain. Both diboracumulenic and borynic molecules have perpendicular end-groups. The diboracumulenic structure is understood in terms of the usual  $\pi$ -bonding picture. The borynic structure can be understood as the terminal N-heterocyclic carbene rings having 6  $\pi$ -electrons. This allows the carbene lone-pair to form a dative bond into the boryne moiety.<sup>15-19</sup>

The difference between diboracumulene and boryne is also straightforward to derive from the frontier MOs,<sup>10,11,20</sup> which are shown in rectilinear and helical representations in Figure S2a. In dibora[3]cumulene the HOMO and HOMO-1 have bonding character across each of the C-B double-bonds. In the boryne these switch place energetically with the LUMO and LUMO+1, so that the HOMO and HOMO-1 instead have bonding character across the B-B bond. The helical and rectilinear representations of the MOs are no different in this regard, but it may be visually clearer from the rectilinear MOs when a 3D-rotatable picture is not available.

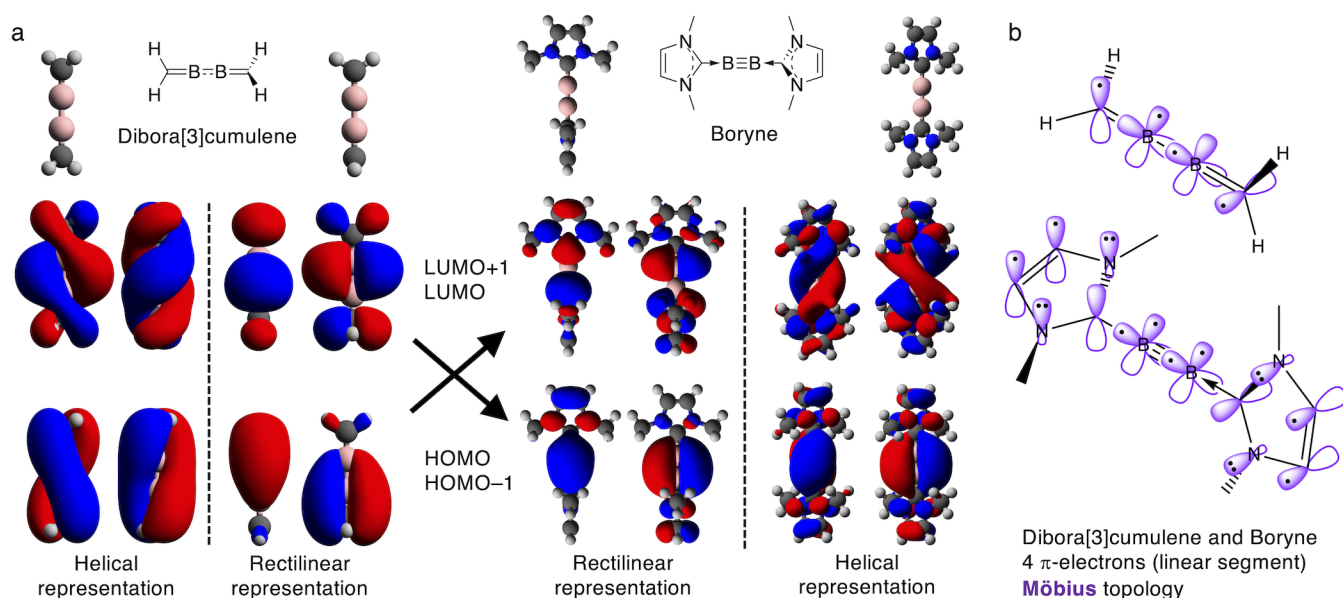

Figure S2: a) Optimized structures and HOMO-1 to LUMO+1 in both their two symmetry-adapted versions of  $D_{2d}$  bora[3]cumulene and boryne. b) Schematic overview of number of  $\pi$ -electrons in the linear segments of dibora[3]cumulene and boryne.

The change in bonding from the bora[3]cumulene to the boryne in Figure S2a has notable effect on the molecular structure. The C-B bond lengths change from 1.49 Å to 1.39 Å, and the B-B bond length from 1.45 Å to 1.59 Å. Despite the quite different bonding motifs and change of occupation in the frontier MOs, the end-groups remain perpendicular in both systems. When we draw up the coarctate orbital bases in Figure S2b, we may realize that in both cases there are 4  $\pi$ -electrons in the linear segments of the molecules. Because the  $\pi$ -electron count does not change, the molecules have similar geometries. Both adopt a perpendicular structure to achieve Möbius topology.

## Frontier MOs During Torsion

The frontier MOs of  $D_2$  and  $C_{2v}$  Allene and spiropentadiene radical cations are shown at different dihedral angles in Figure S3. The corresponding eigenvalue and energy profiles are shown in Figure 9 in the manuscript. While the  $D_2$  structures have helical MOs at both  $60^\circ$  and  $90^\circ$ , the  $C_{2v}$  structures have rectilinear  $\pi$ -MOs at  $90^\circ$  and helical MOs at  $60^\circ$ .

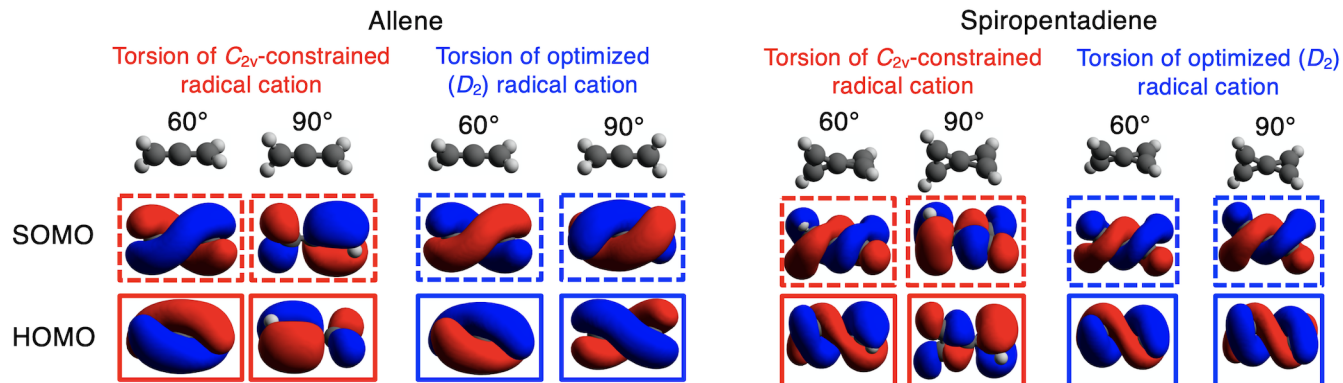

Figure S3: Frontier MOs of allene and spiropentadiene radical cations computed at different torsion angles starting from the optimized  $D_2$  and constrained  $C_{2v}$  structures. The SOMO and doubly-occupied HOMO are shown at  $60^\circ$  and  $90^\circ$  torsion angle.

## References

- (1) Chai, J.-D.; Head-Gordon, M. Long-range corrected hybrid density functionals with damped atom-atom dispersion corrections. *Phys. Chem. Chem. Phys.* **2008**, *10*, 6615–6620.
- (2) Weigend, F.; Ahlrichs, R. Balanced basis sets of split valence, triple zeta valence and quadruple zeta valence quality for H to Rn: Design and assessment of accuracy. *Phys. Chem. Chem. Phys.* **2005**, *7*, 3297–3305.
- (3) Frisch, M. J.; Trucks, G. W.; Schlegel, H. B.; Scuseria, G. E.; Robb, M. A.; Cheeseman, J. R.; Scalmani, G.; Barone, V.; Petersson, G. A.; Nakatsuji, H. et al. Gaussian 16 Revision A.03. 2016; Gaussian Inc. Wallingford CT.
- (4) Schulenburg, A. M.; Merkt, F. Rotationally resolved photoelectron spectroscopic study of the Jahn–Teller effect in allene. *J. Chem. Phys.* **2009**, *130*, 034308.
- (5) Schulenburg, A.; Merkt, F. Internal rotation in Jahn–Teller coupled systems: The ethene and allene cations. *Chem. Phys.* **2010**, *377*, 66–77.
- (6) Fdez. Galván, I.; Vacher, M.; Alavi, A.; Angeli, C.; Aquilante, F.; Autschbach, J.; Bao, J. J.; Bokarev, S. I.; Bogdanov, N. A.; Carlson, R. K. et al. OpenMolcas: From Source Code to Insight. *J. Chem. Theory Comput.* **2019**, *15*, 5925–5964, PMID: 31509407.
- (7) Aquilante, F.; Autschbach, J.; Baiardi, A.; Battaglia, S.; Borin, V. A.; Chibotaru, L. F.; Conti, I.; De Vico, L.; Delcey, M.; Fdez. Galván, I. et al. Modern quantum chemistry with [Open]Molcas. *J. Chem. Phys.* **2020**, *152*, 214117.
- (8) Okuyama, K.; Hasegawa, T.; Ito, M.; Mikami, N. Electronic spectra of tolan in a supersonic free jet: large-amplitude torsional motion. *J. Phys. Chem.* **1984**, *88*, 1711–1716.



- (9) Thulstrup, P. W.; Hoffmann, S. V.; Hansen, B. K. V.; Spanget-Larsen, J. Unique interplay between electronic states and dihedral angle for the molecular rotor diphenyl-diacetylene. *Phys. Chem. Chem. Phys.* **2011**, *13*, 16168–16174.
- (10) Braunschweig, H.; Dewhurst, R. D.; Hammond, K.; Mies, J.; Radacki, K.; Vargas, A. Ambient-Temperature Isolation of a Compound with a Boron-Boron Triple Bond. *Science* **2012**, *336*, 1420–1422.
- (11) Böhnke, J.; Braunschweig, H.; Ewing, W. C.; Hörl, C.; Kramer, T.; Krummenacher, I.; Mies, J.; Vargas, A. Diborabutatriene: An Electron-Deficient Cumulene. *Angew. Chem. Int. Ed.* **2014**, *53*, 9082–9085.
- (12) Böhnke, J.; Braunschweig, H.; Constantinidis, P.; Dellermann, T.; Ewing, W. C.; Fischer, I.; Hammond, K.; Hupp, F.; Mies, J.; Schmitt, H.-C. et al. Experimental Assessment of the Strengths of B-B Triple Bonds. *J. Am. Chem. Soc.* **2015**, *137*, 1766–1769.
- (13) Arrowsmith, M.; Braunschweig, H.; Stennett, T. E. Formation and Reactivity of Electron-Precise B-B Single and Multiple Bonds. *Angew. Chem. Int. Ed.* **2017**, *56*, 96–115.
- (14) Balakrishnan, A.; Vijayakumar, S. Highly delocalised molecular orbitals in boron-, carbon- and nitrogen-based linear chains: a DFT study. *Mol. Phys.* **2022**, e2020923.
- (15) Köppe, R.; Schnöckel, H. The boron-boron triple bond? A thermodynamic and force field based interpretation of the N-heterocyclic carbene (NHC) stabilization procedure. *Chem, Sci.* **2015**, *6*, 1199–1205.
- (16) Perras, F. A.; Ewing, W. C.; Dellermann, T.; Böhnke, J.; Ullrich, S.; Schäfer, T.; Braunschweig, H.; Bryce, D. L. Spying on the boron-boron triple bond using spin-spin coupling measured from  $^{11}\text{B}$  solid-state NMR spectroscopy. *Chem. Sci.* **2015**, *6*, 3378–3382.

- (17) Holzmann, N.; Hermann, M.; Frenking, G. The boron-boron triple bond in NHC-BB-NHC. *Chem. Sci.* **2015**, *6*, 4089–4094.
- (18) Mierzwa, G.; Gordon, A. J.; Berski, S. The nature of the triple B B, double, B B, single, B-B, and one-electron, BB boron-boron bonds from the topological analysis of electron localisation function (ELF) perspective. *J. Mol. Struct.* **2020**, *1221*, 128530.
- (19) Gorantla, S. M. N. V. T.; Pan, S.; Mondal, K. C.; Frenking, G. Revisiting the Bonding Scenario of Two Donor Ligand Stabilized C2 Species. *J. Phys. Chem. A* **2021**, *125*, 291–301.
- (20) Xu, C.; Ma, Y.; Cheng, L. Revisiting the  $\pi$ -Back-Donation in the NHC-B-B-NHC Molecule. *J. Phys. Chem. A* **2021**, *125*, 1681–1687.
